# Supplementary material for: Bioprospecting of Actinobacterial Diversity and Antibacterial Secondary Metabolites from the Sediments of Four Saline Lakes on the Northern Tibetan Plateau
Source: MDPI journal article supplement (doi:10.3390/microorganisms11102475), 2023-10-01

# Bioprospecting of Actinobacterial Diversity and Antibacterial Secondary Metabolites from the Sediments of Four Saline Lakes on the Northern Tibetan Plateau

Shao-Wei Liu <sup>1</sup>, Xiao-Xu Zhai <sup>1,2,3</sup>, Di Liu <sup>1,3</sup>, Yu-Yu Liu <sup>1</sup>, Li-Ying Sui <sup>4</sup>, Ke-Ke Luo <sup>1</sup>, Qin Yang <sup>1</sup>, Fei-Na Li <sup>5</sup>, Arina A. Nikandrova <sup>6,7</sup>, Arina N. Imamutdinova <sup>6,8</sup>, Dmitrii A. Lukianov <sup>6,8</sup>, Ilya A. Osterman <sup>6,8</sup>, Petr V. Sergiev <sup>6,8</sup>, Ben-Yin Zhang <sup>9</sup>, De-Jun Zhang <sup>9</sup>, Chun-Mei Xue <sup>3,\*</sup> and Cheng-Hang Sun <sup>1,2,9,\*</sup>

<sup>1</sup> Department of Microbial Chemistry, Beijing Key Laboratory of Antimicrobial Agents, Institute of Medicinal Biotechnology, Chinese Academy of Medical Sciences, Peking Union Medical College, Beijing 100050, China; liushaowei3535@163.com (S.-W.L.)

<sup>2</sup> State Key Laboratory of Plateau Ecology and Agriculture, Qinghai University, Xining 810016, China

<sup>3</sup> College of Life Sciences, Jiamusi University, Jiamusi 154000, China

<sup>4</sup> College of Marine and Environmental Sciences, Tianjin University of Science and Technology, Tianjin 300457, China

<sup>5</sup> Laboratory of Respiratory Diseases, Beijing Key Laboratory of Pediatric Respiratory Infection Diseases, Beijing Pediatric Research Institute, Beijing Children's Hospital, Capital Medical University, Key Laboratory of Major Diseases in Children, Ministry of Education, National Clinical Research Center for Respiratory Diseases, National Center for Children's Health, Beijing 100045, China; hbulifeina@126.com

<sup>6</sup> Center of Life Sciences, Skolkovo Institute of Science and Technology, 121205 Moscow, Russia

<sup>7</sup> Department of Biology, Lomonosov Moscow State University, 119991 Moscow, Russia

<sup>8</sup> Department of Chemistry, Lomonosov Moscow State University, 119991 Moscow, Russia

<sup>9</sup> College of Eco-Environmental Engineering, Qinghai University, Xining 810016, China; benyinzhang@qhu.edu.cn (B.-Y.Z.); djzhang@qhu.edu.cn (D.-J.Z.)

\* Correspondence: jmsxcm@126.com (C.-M.X.); chenghangsun@hotmail.com (C.-H.S.)

## Content

**Table S1.** Information of sediment samples collected from four saline lakes.

**Table S2.** Compositions of the media used in the study.

**Table S3.** Taxonomic statistics of the isolated 255 actinobacterial strains.

**Table S4.** Antibacterial profile of 46 bioactive strains isolated from sediments of four saline lakes on the Northern Tibetan Plateau.

**Table S5.** Antimicrobial activities of crude extracts from two selected *streptomyces* strains 378 and 549.

**Table S6.** Putatively identified metabolites from liquid culture extracts of strains 378 and 549.

**Table S7.** Biosynthesis gene clusters of secondary metabolites from strain 378 detected by anti-SMASH.

**Table S8.** Biosynthesis gene clusters of secondary metabolites from strain 549 detected by anti-SMASH.

**Figure S1.** Neighbor-joining phylogenetic tree based on 16S rRNA gene sequences of strain LD-9 (1509 bp) and related type species of family *Microbacteriaceae*.

**Figure S2.** UPLC-MS/MS spectra of putative cosmomycin compounds (**7-15**) from strain 378 acquired by MS<sup>E</sup> method.

**Figure S3.** UPLC-MS/MS spectra of putative kidamycin derivatives (**16-21**) from strain 549 acquired by MS<sup>E</sup> method.

**Figure S4.** Similar known clusters for the putative type II polyketide BGC from strain 378.

**Figure S5.** Similar known clusters for the putative type II polyketide BGC from strain 549.

**Table S1.** Information of sediment samples collected from four saline lakes.

| Samples | Lake Name              | Latitude&<br>Longitude       | Elevation<br>(m) | pH   | Salinity<br>(g/L) |
|---------|------------------------|------------------------------|------------------|------|-------------------|
| 1       | Dangqiong Co           | 31°35'24"N,<br>86°47'24"E    | 4428             | 8.66 | 110               |
| 2       | Dong Co                | 32°7'11.99"N,<br>84°45'00"E  | 4365             | 8.82 | 40                |
| 3       | Nieer Co               | 32°14'23.99"N,<br>82°13'48"E | 4365             | 8.25 | 100               |
| 4       | Nameless<br>salty lake | 32°32'24"N,<br>82°28'12"E    | 4366             | 7.66 | 50                |

**Table S2.** Compositions of the media used in the study.

| NO.                                                     | Name                                                        | Composition (In 1.0 L distilled water)                                                                                                                                                                                                                                                                                                                         |
|---------------------------------------------------------|-------------------------------------------------------------|----------------------------------------------------------------------------------------------------------------------------------------------------------------------------------------------------------------------------------------------------------------------------------------------------------------------------------------------------------------|
| <b>Used for the isolation of actinobacteria (M1-M8)</b> |                                                             |                                                                                                                                                                                                                                                                                                                                                                |
| M1                                                      | Modified PYG medium<br>(pH 8.0, 0 % NaCl)                   | Peptone 3.0 g, Yeast extract 5.0 g, Glycerol 10.0 g, Betaine 1.25 g, Sodium pyruvate 1.25 g, Agar 15.0 g, pH 8.0                                                                                                                                                                                                                                               |
| M2                                                      | ISP 2 medium<br>(pH 8.0, 0 % NaCl)                          | Yeast extract 4.0 g, Glucose 4.0 g, Malt extract 5.0 g, Vitamin mixture <sup>a</sup> 1.0 mL, Trace salt <sup>b</sup> 1.0 mL, Agar 15.0 g, pH 8.0                                                                                                                                                                                                               |
| M3                                                      | Modified R2A medium<br>(pH 8.0, 3 % NaCl)                   | R2A (BD) 18.6 g, NaCl 30.0 g, Agar 12.0 g, pH 8.0                                                                                                                                                                                                                                                                                                              |
| M4                                                      | Modified Glycerol-arginine<br>medium (pH 8.0, 5 % NaCl)     | Arginine 2.0 g, Glycerol 12.5 g, K <sub>2</sub> HPO <sub>4</sub> ·3H <sub>2</sub> O 2.0 g, FeSO <sub>4</sub> ·7H <sub>2</sub> O 0.01 g, MgSO <sub>4</sub> ·7H <sub>2</sub> O 0.05 g, CuSO <sub>4</sub> ·5H <sub>2</sub> O 0.001 g, ZnSO <sub>4</sub> ·7H <sub>2</sub> O 0.001 g, MnSO <sub>4</sub> ·H <sub>2</sub> O 0.001 g, NaCl 50.0 g, Agar 15.0 g, pH 8.0 |
| M5                                                      | Modified PYG medium<br>(pH 10.0, 0 % NaCl)                  | Same as M1, pH 10.0                                                                                                                                                                                                                                                                                                                                            |
| M6                                                      | ISP 2 medium<br>(pH 10.0, 0 % NaCl)                         | Same as M2, pH 10.0                                                                                                                                                                                                                                                                                                                                            |
| M7                                                      | Modified R2A medium<br>(pH 10.0, 3 % NaCl)                  | Same as M3, pH 10.0                                                                                                                                                                                                                                                                                                                                            |
| M8                                                      | Modified Glycerol-arginine<br>medium (pH 10.0, 5 %<br>NaCl) | Same as M4, pH 10.0                                                                                                                                                                                                                                                                                                                                            |
| <b>Used for OSMAC fermentation (FM1-FM4)</b>            |                                                             |                                                                                                                                                                                                                                                                                                                                                                |
| FM1                                                     | TSB medium                                                  | TSB (BD) g, pH 8.0                                                                                                                                                                                                                                                                                                                                             |
| FM2                                                     | ISP 2 medium                                                | Yeast extract 4.0 g, Glucose 4.0 g, Malt extract 5.0 g, Vitamin mixture <sup>a</sup> 1.0 mL, Trace salt <sup>b</sup> 1.0 mL, pH                                                                                                                                                                                                                                |

|     |                                                                                                                                                                                                                      |
|-----|----------------------------------------------------------------------------------------------------------------------------------------------------------------------------------------------------------------------|
|     | 8.0                                                                                                                                                                                                                  |
| FM3 | Yeast extract 5.0 g, Glucose 5.0 g, Maltose 10.0 g, Cottonseed meal 10.0 g, Starch 20.0 g, pH 8.0                                                                                                                    |
| FM4 | Starch 5.0 g, Glucose 2.0 g, Peptone 2.0 g, Yeast extract 2.0 g, Soybean meal 10.0 g, NaCl 40.0 g, K <sub>2</sub> PO <sub>4</sub> 0.5 g, MgSO <sub>4</sub> ·7H <sub>2</sub> O 0.5 g, CaCO <sub>3</sub> 2.0 g, pH 8.0 |

Note: <sup>a</sup> Vitamin mixture: thiamine 0.1 g, pyridoxine 0.1 g, riboflavin 0.1g, niacin 0.1 g, biotin 0.1 g, distilled water 100.0 mL.

<sup>b</sup> Trace salt solution: FeSO<sub>4</sub>·7H<sub>2</sub>O 0.2 g, MnCl<sub>2</sub>·4H<sub>2</sub>O 0.01 g, ZnSO<sub>4</sub>·7H<sub>2</sub>O 0.01 g, distilled water 100.0 ml.

**Table S3.** Taxonomic statistics of the isolated 255 actinobacterial strains.

| Taxon                                    |                           |                          | No. of isolates |
|------------------------------------------|---------------------------|--------------------------|-----------------|
| Order (6)                                | Family (12)               | Genus (21)               |                 |
| <i>Streptomycetales</i>                  | <i>Streptomycetaceae</i>  | <i>Streptomyces</i>      | 70              |
| <i>Micrococcales</i>                     | <i>Microbacteriaceae</i>  | <i>Agromyces</i>         | 3               |
|                                          |                           | <i>Microbacterium</i>    | 4               |
|                                          | <i>Micrococcaceae</i>     | <i>Kocuria</i>           | 43              |
|                                          |                           | <i>Nesterenkonia</i>     | 10              |
|                                          |                           | <i>Arthrobacter</i>      | 27              |
|                                          |                           | <i>Citricoccus</i>       | 24              |
|                                          |                           | <i>Pseudarthrobacter</i> | 10              |
|                                          |                           | <i>Paenarthrobacter</i>  | 2               |
|                                          | <i>Bogoriellaceae</i>     | <i>Georgenia</i>         | 8               |
|                                          |                           | <i>Pseudoclavibacter</i> | 2               |
|                                          |                           | <i>Salinibacterium</i>   | 1               |
|                                          |                           | <i>Cellulomonas</i>      | 7               |
|                                          | <i>Jonesiaceae</i>        | <i>Jonesia</i>           | 8               |
|                                          |                           | <i>Flavimobilis</i>      | 1               |
| <i>Mycobacteriales</i>                   | <i>Dietziaceae</i>        | <i>Dietzia</i>           | 20              |
|                                          | <i>Nocardiaceae</i>       | <i>Rhodococcus</i>       | 6               |
|                                          | <i>Hoyosellaceae</i>      | <i>Hoyosella</i>         | 1               |
| <i>Streptosporangiales</i>               | <i>Nocardiopsaceae</i>    | <i>Nocardiopsis</i>      | 5               |
| <i>Brevibacteriales</i>                  | <i>Brevibacteriaceae</i>  | <i>Brevibacterium</i>    | 1               |
| <i>Micromonosporales</i>                 | <i>Micromonosporaceae</i> | <i>Micromonospora</i>    | 2               |
| Total number of actinobacterial isolates |                           |                          | 255             |

**Table S4.** Antibacterial profile of 46 bioactive strains isolated from sediments of four saline lakes on the Northern Tibetan Plateau. Inhibitory rates exceeding 60% are highlighted in yellow colour.

| NO. | Isolates<br>(GenBank<br>accession NO.) | Top-hit taxon<br>(Pairwise similarity)                              | Fermentation<br>media | Inhibitory Rate (IR) |       |                          |       |                          |       |                         |       |                  |       |                    |       |
|-----|----------------------------------------|---------------------------------------------------------------------|-----------------------|----------------------|-------|--------------------------|-------|--------------------------|-------|-------------------------|-------|------------------|-------|--------------------|-------|
|     |                                        |                                                                     |                       | <i>E. coli</i>       |       | <i>P.<br/>aeruginosa</i> |       | <i>K.<br/>pneumoniae</i> |       | <i>A.<br/>baumannii</i> |       | <i>S. aureus</i> |       | <i>E. faecalis</i> |       |
|     |                                        |                                                                     |                       | S                    | R     | S                        | R     | S                        | R     | S                       | R     | S                | R     | S                  | R     |
| 1   | 104<br>(OQ509810)                      | <i>Streptomyces sparsus</i><br>90018 <sup>T</sup> , 99.9%           | YIM FM1               | 15.1                 | 1.9   | 21.8                     | -5.2  | 7.4                      | 22.5  | 34.5                    | 26.9  | -13.9            | -22.0 | 34.1               | 54.3  |
|     |                                        |                                                                     | FM2                   | 7.2                  | 18.6  | 9.9                      | 6.7   | 3.1                      | 15.5  | 9.3                     | -16.6 | 7.4              | -3.5  | 22.6               | 54.6  |
|     |                                        |                                                                     | FM3                   | -7.9                 | -0.2  | 30.6                     | -13.0 | 2.6                      | 9.5   | 4.2                     | 0.4   | 4.8              | -4.7  | 38.9               | 60.4  |
|     |                                        |                                                                     | FM4                   | -8.6                 | 0.4   | -3.7                     | -6.8  | 6.5                      | -1.6  | -9.7                    | -4.6  | -5.5             | -9.2  | 20.0               | 4.8   |
| 2   | 116<br>(OQ509811)                      | <i>Streptomyces sparsus</i><br>90018 <sup>T</sup> , 99.7%           | YIM FM1               | 14.4                 | 0.0   | 7.6                      | 0.7   | -11.7                    | 17.7  | 6.6                     | 62.8  | 2.4              | -2.3  | 21.1               | 38.8  |
|     |                                        |                                                                     | FM2                   | 11.2                 | 6.6   | -17.1                    | -0.4  | 0.3                      | 17.8  | 20.5                    | -8.8  | -9.0             | -6.5  | 11.0               | 47.0  |
|     |                                        |                                                                     | FM3                   | -12.8                | -2.9  | -6.3                     | -3.6  | -2.6                     | -10.7 | -1.8                    | -1.6  | -8.0             | -7.6  | 24.5               | 46.8  |
|     |                                        |                                                                     | FM4                   | -13.5                | -6.8  | -5.6                     | -2.8  | -0.5                     | -7.4  | -3.9                    | -1.7  | -14.1            | -9.7  | 30.5               | 19.9  |
| 3   | S683<br>(OQ509812)                     | <i>Streptomyces rishiriensis</i><br>NBRC 13407 <sup>T</sup> , 98.3% | YIM FM1               | 27.8                 | -17.3 | 0.9                      | -2.4  | 56.3                     | 47.5  | 25.1                    | -5.3  | 79.7             | 50.6  | 67.1               | 24.4  |
|     |                                        |                                                                     | FM2                   | -5.8                 | -4.5  | -23.3                    | -11.0 | 4.3                      | 25.3  | -16.8                   | -9.5  | 30.1             | 49.2  | 44.4               | -3.1  |
|     |                                        |                                                                     | FM3                   | -5.7                 | -7.0  | 10.6                     | -33.5 | -8.4                     | -8.9  | 7.0                     | -8.6  | 27.0             | 42.7  | 75.6               | 15.6  |
|     |                                        |                                                                     | FM4                   | 4.0                  | -10.2 | -11.1                    | -11.7 | -4.6                     | -2.8  | -5.9                    | -8.1  | -9.7             | 10.5  | 12.2               | -5.3  |
| 4   | S503<br>(OQ509813)                     | <i>Streptomyces sparsus</i><br>90018 <sup>T</sup> , 99.7%           | YIM FM1               | 0.0                  | -8.4  | -7.7                     | -17.6 | -0.5                     | -2.3  | 0.6                     | -11.9 | 9.6              | -15.4 | 0.9                | -18.2 |
|     |                                        |                                                                     | FM2                   | -3.7                 | -10.5 | -14.9                    | -16.0 | 1.2                      | -17.8 | -3.3                    | -15.6 | 18.5             | 4.5   | -19.6              | 5.8   |
|     |                                        |                                                                     | FM3                   | -19.4                | -11.4 | -17.0                    | -23.1 | 0.0                      | -7.0  | -14.4                   | 5.6   | -14.6            | 8.5   | 3.1                | -6.4  |
|     |                                        |                                                                     | FM4                   | 1.2                  | -8.9  | 1.1                      | -3.5  | 0.3                      | -17.6 | 1.7                     | 9.7   | 1.1              | 62.0  | -17.3              | -13.6 |
| 5   | S600<br>(OQ509814)                     | <i>Streptomyces sparsus</i><br>90018 <sup>T</sup> , 99.6%           | YIM FM1               | 6.9                  | -9.9  | 2.0                      | -8.1  | -24.3                    | -2.1  | 7.0                     | -7.7  | -9.4             | -2.0  | -1.3               | -0.7  |
|     |                                        |                                                                     | FM2                   | -11.9                | -10.5 | -10.4                    | -10.2 | -15.4                    | -4.0  | 88.8                    | -8.8  | -5.2             | -1.8  | -7.8               | -1.8  |

|    |                     |                                                                     |      |     |       |       |       |       |       |       |       |       |       |       |       |       |      |
|----|---------------------|---------------------------------------------------------------------|------|-----|-------|-------|-------|-------|-------|-------|-------|-------|-------|-------|-------|-------|------|
|    |                     |                                                                     |      |     | FM3   | -7.0  | -4.9  | -12.2 | -13.5 | -11.1 | -13.3 | -17.3 | -15.3 | -9.2  | -2.3  | -4.4  | -7.8 |
|    |                     |                                                                     |      |     | FM4   | -8.4  | 16.0  | -10.6 | -15.2 | -18.3 | -10.2 | -12.5 | -18.3 | -10.9 | -5.0  | -1.8  | 3.8  |
| 6  | S542<br>(OQ509815)  | <i>Streptomyces sparsus</i><br>90018 <sup>T</sup> , 99.7%           | YIM  | FM1 | -11.8 | -23.4 | -1.5  | -9.0  | -18.1 | -7.1  | 71.4  | 28.0  | -8.2  | -8.2  | 7.8   | -10.8 |      |
|    |                     |                                                                     |      | FM2 | -10.1 | -8.5  | -8.0  | -12.5 | -12.2 | -1.6  | -8.3  | -9.2  | -7.5  | -2.8  | -9.0  | 0.2   |      |
|    |                     |                                                                     |      | FM3 | -4.2  | -3.0  | -11.0 | 10.3  | -3.5  | -6.2  | 11.8  | -6.5  | 6.4   | 14.2  | 7.6   | -6.8  |      |
|    |                     |                                                                     |      | FM4 | -16.4 | -0.7  | -9.4  | -3.5  | -9.4  | -7.6  | -8.4  | -3.7  | 12.3  | -1.2  | -4.5  | 21.3  |      |
| 7  | S549<br>(OQ509816)  | <i>Streptomyces sparsus</i><br>90018 <sup>T</sup> , 99.9%           | YIM  | FM1 | 9.3   | -9.2  | -13.2 | -8.1  | 0.6   | -3.6  | -0.5  | -1.9  | -5.7  | -3.3  | -12.6 | -0.6  |      |
|    |                     |                                                                     |      | FM2 | -6.3  | -7.3  | -1.0  | -13.3 | -7.2  | -6.6  | 1.2   | 10.1  | -16.5 | 6.7   | -11.2 | -2.9  |      |
|    |                     |                                                                     |      | FM3 | -16.4 | -0.6  | 4.2   | -6.8  | -11.8 | -6.7  | -14.7 | -1.9  | 46.0  | -0.3  | -2.1  | 23.2  |      |
|    |                     |                                                                     |      | FM4 | 78    | 85.1  | 11.1  | -13.8 | -12.3 | -15.2 | -11.5 | -13.0 | 91.7  | 81.7  | 86.1  | 76.7  |      |
| 8  | S502<br>(OQ5098117) | <i>Streptomyces sparsus</i><br>90018 <sup>T</sup> , 99.7%           | YIM  | FM1 | 1.0   | -0.2  | -3.9  | 15.7  | -8.9  | -7.2  | -7.4  | 21.8  | 5.7   | -0.9  | -7.8  | -6.8  |      |
|    |                     |                                                                     |      | FM2 | -5.9  | -9.4  | -11.5 | -2.1  | -2.1  | -3.3  | -7.7  | -2.1  | -3.6  | -1.2  | -6.8  | -2.5  |      |
|    |                     |                                                                     |      | FM3 | -13.7 | -6.5  | 6.3   | 8.4   | -10.0 | -0.5  | -4.3  | -10.0 | 8.0   | 1.7   | 4.5   | -9.5  |      |
|    |                     |                                                                     |      | FM4 | -6.2  | -6.7  | 7.0   | 0.2   | -3.8  | -6.4  | -9.0  | -2.9  | 64.1  | 78.4  | 42.6  | 71.2  |      |
| 9  | 378<br>(OQ509818)   | <i>Streptomyces marokkonensis</i><br>Ap1 <sup>T</sup> , 99.4%       |      | FM1 | -8.3  | -4.7  | -0.2  | -8.6  | -5.1  | -8.8  | -3.1  | -10.8 | 8.5   | -8.9  | -9.5  | -10.9 |      |
|    |                     |                                                                     |      | FM2 | -9.2  | -7.5  | -4.1  | -9.4  | -9.4  | 13.5  | -11.3 | -4.1  | 3.1   | 3.1   | -2.1  | -10.0 |      |
|    |                     |                                                                     |      | FM3 | -6.4  | -7.3  | -13.0 | -7.4  | -15.1 | -10.3 | -18.1 | -4.1  | 15.4  | 8.9   | 1.0   | -7.1  |      |
|    |                     |                                                                     |      | FM4 | 83.5  | -3.5  | -13.4 | -8.9  | 15.2  | -4.3  | -8.5  | 3.4   | 76.6  | 78.7  | 84.4  | 78.0  |      |
| 10 | 267<br>(OQ5098119)  | <i>Streptomyces bacillaris</i><br>13487 <sup>T</sup> , 99.2%        | NBRC | FM1 | -5.5  | -0.7  | -7.8  | 1.1   | -8.3  | -7.8  | -13.9 | -1.2  | 14.1  | 0.8   | 27.9  | 40.2  |      |
|    |                     |                                                                     |      | FM2 | -9.6  | 27.2  | -8.8  | -1.3  | -6.7  | -4.3  | -3.9  | 8.8   | 6.7   | 15.6  | 32.2  | 13.3  |      |
|    |                     |                                                                     |      | FM3 | -5.7  | -13.3 | -12.0 | -1.3  | -4.2  | -6.2  | 72.2  | -7.7  | 1.5   | 7.8   | -4.4  | 30.4  |      |
|    |                     |                                                                     |      | FM4 | -6.5  | -6.0  | -13.8 | -10.0 | -1.8  | -7.9  | -2.7  | -9.3  | 27.0  | 29.2  | -6.8  | -8.2  |      |
| 11 | X132<br>(OQ509820)  | <i>Streptomyces rishiriensis</i><br>NBRC 13407 <sup>T</sup> , 98.8% |      | FM1 | -14.9 | -4.3  | 96.3  | -5.4  | -7.4  | -9.5  | -1.2  | -21.8 | -7.0  | -11.6 | 6.5   | -1.6  |      |
|    |                     |                                                                     |      | FM2 | 12.6  | -13.3 | 8.2   | 24.1  | -15.0 | -10.1 | 51.5  | -8.8  | -9.2  | -10.3 | -4.4  | 21.1  |      |
|    |                     |                                                                     |      | FM3 | -6.6  | -9.4  | -0.7  | 6.8   | -11.7 | -10.8 | 25.1  | -7.6  | -4.0  | -19.7 | 7.5   | 8.0   |      |

|    |             |                                   |                       |     |       |       |       |       |       |       |       |       |       |       |       |       |
|----|-------------|-----------------------------------|-----------------------|-----|-------|-------|-------|-------|-------|-------|-------|-------|-------|-------|-------|-------|
|    |             |                                   |                       | FM4 | 6.6   | -1.6  | 10.9  | -12.1 | -11.6 | -10.4 | 35.7  | -8.1  | -7.1  | 7.2   | -1.2  | 22.5  |
| 12 | X93-1       | <i>Streptomyces marokkonensis</i> |                       | FM1 | 11.4  | -1.5  | -9.0  | 15.0  | 5.5   | -11.3 | -17.7 | -10.4 | -4.3  | -3.8  | 7.8   | -5.6  |
|    | (OQ509821)  | Ap1 <sup>T</sup> , 99.1%          |                       | FM2 | 4.6   | 14.0  | -2.7  | 5.2   | 2.4   | -1.8  | -16.3 | -11.4 | -4.4  | -1.1  | 10.6  | -5.7  |
|    |             |                                   |                       | FM3 | 11.1  | -15.0 | -1.9  | -4.5  | -7.4  | -3.6  | 12.5  | -17.8 | -12.9 | -15.2 | -2.0  | -3.2  |
|    |             |                                   |                       | FM4 | 4.3   | -8.8  | 8.6   | -3.7  | 14.5  | -1.1  | -9.2  | -1.8  | 66.8  | 67.6  | 13.5  | -12.6 |
| 13 | X326        | <i>Streptomyces sparsus</i>       | YIM                   | FM1 | -4.9  | -14.3 | 96.3  | 9.2   | 9.5   | -0.7  | -10.2 | -7.2  | -6.6  | 5.5   | -13.3 | -5.7  |
|    | (OQ509822)  | 90018 <sup>T</sup> , 99.9%        |                       | FM2 | -8.6  | -13.3 | 8.2   | 4.1   | 6.4   | -10.1 | -6.2  | -41.8 | -10.7 | 2.4   | 17.2  | 12.9  |
|    |             |                                   |                       | FM3 | -7.7  | -9.4  | -0.7  | 8.6   | -16.5 | -15.5 | 10.4  | -52.3 | -5.2  | -7.4  | 14.1  | -10.7 |
|    |             |                                   |                       | FM4 | -7.7  | -1.6  | 10.9  | -11.6 | -14.8 | -12.6 | -3.6  | -24.1 | -2.9  | 14.5  | -1.0  | 10.2  |
| 14 | X15-2       | <i>Streptomyces sparsus</i>       | YIM                   | FM1 | 40.3  | -11.7 | -15.0 | 7.2   | 3.2   | 61.8  | 13.8  | -14.5 | -23.9 | 6.4   | -10.3 | -7.7  |
|    | (OQ509823)  | 90018 <sup>T</sup> , 99.9%        |                       | FM2 | -6.3  | -12.5 | -16.1 | 2.6   | 18.5  | 15.4  | -9.2  | -6.0  | -7.0  | 36.8  | -11.6 | -5.2  |
|    |             |                                   |                       | FM3 | -17.7 | -8.3  | 2.2   | 1.2   | 11.3  | 7.1   | 12.5  | -6.4  | -3.4  | 11.5  | -14.0 | -9.8  |
|    |             |                                   |                       | FM4 | -4.0  | -10.7 | -7.5  | -9.3  | -0.2  | 2.2   | 28.5  | -9.9  | -7.8  | 2.8   | -18.4 | -8.8  |
| 15 | 99-1        | <i>Arthrobacter pascens</i>       | DSM                   | FM1 | -7.1  | -5.7  | -8.1  | 17.1  | -12.2 | -11.0 | 74.1  | -8.7  | -5.5  | -15.3 | 2.1   | -1.8  |
|    | (OQ509824)  | 20545 <sup>T</sup> , 99.9%        |                       | FM2 | -1.8  | -9.9  | -6.8  | 11.4  | -4.8  | -16.4 | 11.4  | -7.4  | -3.8  | -7.2  | -7.1  | 9.5   |
|    |             |                                   |                       | FM3 | -7.7  | -3.0  | -5.3  | 24.2  | -12.5 | -0.8  | 64.9  | -5.3  | -3.5  | -9.1  | -17.1 | -7.0  |
|    |             |                                   |                       | FM4 | -7.7  | -6.3  | -3.8  | 3.8   | -16.1 | -1.4  | 9.8   | -4.2  | -5.7  | 2.9   | -31.2 | -6.5  |
| 16 | 60          | <i>Arthrobacter oryzae</i>        | KV-651 <sup>T</sup> , | FM1 | 9.5   | -8.2  | -10.1 | 2.2   | 7.2   | 18.0  | 75.5  | 16.5  | -8.2  | -6.7  | -12.5 | 36.2  |
|    | (OQ5098205) | 99.9%                             |                       | FM2 | 16.1  | -2.7  | -11.9 | -2.6  | 20.1  | 3.5   | 19.9  | 43.9  | 21.5  | -16.8 | 18.9  | 37.2  |
|    |             |                                   |                       | FM3 | 8.3   | 0.0   | -11.3 | -11.8 | 22.1  | -7.7  | 6.8   | 22.0  | -15.2 | -2.9  | -12.9 | 36.8  |
|    |             |                                   |                       | FM4 | 2.5   | 10.6  | 14.6  | -17.8 | 4.5   | -17.7 | -6.7  | -8.5  | -1.4  | 3.4   | 25.0  | 35.7  |
| 17 | S525        | <i>Arthrobacter halodurans</i>    | JSM                   | FM1 | 0.3   | -12.6 | -12.0 | 2.6   | -10.4 | -11.5 | -5.4  | -11.1 | -5.2  | -10.0 | 2.8   | 2.3   |
|    | (OQ509826)  | 078085 <sup>T</sup> , 99.7%       |                       | FM2 | 1.0   | -14.8 | -21.9 | -4.8  | -11.3 | -6.6  | -10.9 | -1.1  | 21.1  | -8.4  | -10.6 | -11.4 |
|    |             |                                   |                       | FM3 | -9.5  | -9.4  | 12.7  | -2.2  | -15.9 | -4.5  | -3.7  | -9.8  | 24.9  | 7.0   | 33.9  | 48.7  |
|    |             |                                   |                       | FM4 | 75.3  | -15.9 | -13.0 | -11.7 | -6.0  | -6.2  | -6.5  | -18.9 | 39.3  | 62.2  | 24.0  | 44.5  |

|    |                     |                                                                   |     |       |       |       |       |       |       |       |       |       |       |       |       |
|----|---------------------|-------------------------------------------------------------------|-----|-------|-------|-------|-------|-------|-------|-------|-------|-------|-------|-------|-------|
| 18 | S706<br>(OQ509827)  | <i>Arthrobacter oryzae</i> KV-651 <sup>T</sup> ,<br>100.0%        | FM1 | -8.7  | -8.4  | -11.6 | -8.9  | 1.0   | -8.9  | 11.4  | 4.1   | -1.5  | 10.3  | 15.2  | -13.1 |
|    |                     |                                                                   | FM2 | -0.5  | -9.2  | -8.9  | -8.6  | -8.6  | -4.6  | -4.4  | 2.2   | -1.0  | 0.8   | -1.2  | -7.1  |
|    |                     |                                                                   | FM3 | 12.3  | -18.9 | -1.1  | -14.4 | -10.4 | 3.7   | -18.9 | 17.3  | 36.5  | 1.9   | -2.4  | 1.6   |
|    |                     |                                                                   | FM4 | -8.2  | -5.3  | -9.3  | -3.2  | -12.7 | -6.9  | -2.8  | -9.7  | 31.5  | 67.6  | 26.5  | 63.1  |
| 19 | 216<br>(OQ509828)   | <i>Arthrobacter oryzae</i> KV-651 <sup>T</sup> ,<br>100.0%        | FM1 | -2.7  | -15.2 | -4.7  | -5.7  | 0.7   | 14.7  | -12.2 | -9.6  | 24.9  | -2.8  | -9.2  | -1.6  |
|    |                     |                                                                   | FM2 | -10.1 | -6.1  | -6.1  | -8.6  | -1.5  | 77.5  | -6.3  | -5.6  | 11.3  | 6.1   | -4.8  | -4.2  |
|    |                     |                                                                   | FM3 | -9.8  | -4.1  | -7.9  | -9.8  | -1.8  | 11.2  | -6.3  | -8.1  | 19.3  | 2.8   | -5.4  | -0.4  |
|    |                     |                                                                   | FM4 | -7.2  | -13.2 | -5.2  | -11.5 | -19.1 | 14.2  | -18.1 | -6.8  | 7.7   | -6.7  | -6.6  | -4.0  |
| 20 | X76<br>(OQ509829)   | <i>Arthrobacter halodurans</i> JSM<br>078085 <sup>T</sup> , 99.9% | FM1 | -13.4 | -6.9  | -3.3  | 8.8   | -1.7  | 6.1   | 3.6   | -1.5  | -8.6  | 77.5  | 4.8   | -3.3  |
|    |                     |                                                                   | FM2 | -11.8 | -3.3  | -2.4  | -0.7  | 3.3   | 15.6  | -6.2  | -1.8  | -11.2 | -1.9  | 56.3  | 47.5  |
|    |                     |                                                                   | FM3 | -4.9  | -3.4  | -1.5  | -0.5  | -17.7 | -13.1 | 3.0   | -9.1  | -4.2  | -6.4  | 4.3   | 25.3  |
|    |                     |                                                                   | FM4 | -1.7  | -8.5  | -8.0  | -2.8  | -10.6 | -10.7 | -16.8 | -5.1  | -8.8  | -1.1  | -8.4  | -8.9  |
| 21 | X2<br>(OQ509830)    | <i>Arthrobacter oryzae</i> KV-651 <sup>T</sup> ,<br>100.0%        | FM1 | -17.1 | -13.0 | -11.0 | 9.6   | -5.3  | 4.2   | -4.8  | -9.4  | -10.5 | 83.5  | -4.6  | 2.8   |
|    |                     |                                                                   | FM2 | -1.8  | -0.7  | -9.4  | 11.6  | -2.4  | 14.9  | -3.4  | -15.1 | -10.3 | -5.1  | -14.1 | 20.4  |
|    |                     |                                                                   | FM3 | -7.7  | -12.7 | -9.6  | 4.9   | -8.4  | 3.3   | -0.4  | 15.2  | -4.3  | -2.4  | -2.3  | 3.8   |
|    |                     |                                                                   | FM4 | -17.7 | -10.8 | -13.4 | 5.5   | -5.3  | -11.4 | -6.4  | -7.9  | -3.1  | -3.9  | -6.7  | 16.7  |
| 22 | X23-3<br>(OQ509831) | <i>Arthrobacter oryzae</i> KV-651 <sup>T</sup> ,<br>99.9%         | FM1 | -7.3  | -6.0  | 9.2   | -1.1  | 6.4   | 7.3   | 12.5  | -13.2 | -3.1  | -3.4  | -3.2  | -5.7  |
|    |                     |                                                                   | FM2 | -5.0  | 11.6  | 21.8  | 6.3   | 36.8  | 21.1  | -17.8 | 4.0   | -5.6  | 6.2   | -11.3 | -5.4  |
|    |                     |                                                                   | FM3 | -16.0 | -14.4 | 0.0   | -8.5  | 11.5  | 9.0   | 95.2  | 15.2  | -9.2  | -2.6  | -10.9 | -0.8  |
|    |                     |                                                                   | FM4 | -8.7  | -4.2  | -9.2  | -8.3  | 2.8   | -10.9 | -7.2  | -8.3  | -7.8  | -23.2 | -9.5  | -6.3  |
| 23 | 23-2<br>(OQ509832)  | <i>Kocuria rosea</i> DSM 20447 <sup>T</sup> ,<br>99.0%            | FM1 | 10.2  | -0.6  | 16.5  | 26.1  | 37.3  | 88.8  | 60.1  | 86.2  | -9.2  | -3.0  | 22.3  | 27.0  |
|    |                     |                                                                   | FM2 | -7.9  | -13.4 | -8.0  | 0.6   | 19.9  | 59.1  | 17.3  | 82.6  | -0.3  | -5.2  | 16.7  | 5.1   |
|    |                     |                                                                   | FM3 | 3.3   | -1.4  | -11.0 | -31.9 | 18.4  | 49.6  | 20.6  | 80.3  | -12.5 | -2.9  | 22.3  | 23.3  |
|    |                     |                                                                   | FM4 | -2.8  | 14.0  | 2.0   | -12.7 | 13.5  | 34.2  | -17.0 | 41.1  | -2.8  | -3.4  | 7.8   | 12.9  |
| 24 | 185                 | <i>Kocuria Polar</i> is CMS 76or <sup>T</sup> ,                   | FM1 | 7.4   | -1.2  | 30.9  | 10.7  | -4.4  | 21.1  | 19.7  | 20.7  | 25.7  | -13.4 | 25.1  | 41.7  |

|    |            |                                              |     |       |       |       |       |       |       |       |      |       |       |       |       |
|----|------------|----------------------------------------------|-----|-------|-------|-------|-------|-------|-------|-------|------|-------|-------|-------|-------|
|    | (OQ509833) | 99.9%                                        | FM2 | 8.6   | 14.0  | 12.5  | 8.9   | 7.5   | 8.0   | 1.2   | -5.7 | -5.8  | -13.2 | 20.9  | 60.1  |
|    |            |                                              | FM3 | 1.2   | 23.6  | 20.6  | 9.2   | -1.2  | 22.5  | -1.4  | -6.4 | 48.8  | 6.3   | 39.2  | 43.9  |
|    |            |                                              | FM4 | -5.1  | -6.6  | -5.6  | -3.8  | -8.1  | -11.3 | -5.0  | -4.7 | 15.6  | -7.6  | 43.7  | 56.1  |
| 25 | 192        | <i>Kocuria Polar</i> CMS 76or <sup>T</sup> , | FM1 | -5.0  | -8.8  | 15.3  | 3.7   | 30.4  | 45.3  | 92.7  | 53.2 | -8.2  | -59.6 | -1.0  | 17.0  |
|    | (OQ509834) | 99.9%                                        | FM2 | -8.4  | -9.6  | 2.2   | -15.9 | -0.6  | 21.8  | 92.2  | 53.6 | -0.7  | -2.0  | -8.2  | 17.1  |
|    |            |                                              | FM3 | -13.4 | -9.6  | -3.9  | -5.4  | 7.7   | 15.7  | 94.5  | 18.4 | 9.9   | -2.0  | 16.0  | 32.3  |
|    |            |                                              | FM4 | -13.3 | 6.5   | -10.1 | -7.8  | 7.8   | -5.6  | 91.3  | -5.6 | 3.6   | -2.2  | 3.3   | 35.5  |
| 26 | S936       | <i>Kocuria Polar</i> CMS 76or <sup>T</sup> , | FM1 | -11.6 | -16.0 | 0.0   | -21.6 | -10.1 | -0.8  | 5.9   | 16.3 | -8.2  | -4.3  | 12.3  | -3.5  |
|    | (OQ509835) | 98.9%                                        | FM2 | -13.4 | -8.1  | 96.0  | -8.9  | -12.6 | -8.3  | -5.4  | 8.8  | 8.0   | -9.5  | -3.8  | -3.6  |
|    |            |                                              | FM3 | -11.0 | -3.4  | -2.9  | -1.1  | -0.1  | -4.1  | -18.8 | -4.8 | 22.1  | -11.8 | 10.0  | -6.4  |
|    |            |                                              | FM4 | -9.7  | -13.3 | -2.5  | -9.3  | -2.7  | -10.1 | -12.9 | -2.3 | 54.6  | 75.6  | 41.3  | 70.8  |
| 27 | S676       | <i>Kocuria Polar</i> CMS 76or <sup>T</sup> , | FM1 | -18.6 | -16.1 | -6.3  | -16.1 | -5.1  | -1.7  | -9.9  | 4.9  | -6.7  | -0.6  | -0.8  | -7.1  |
|    | (OQ509836) | 99.9%                                        | FM2 | -16.1 | -15.6 | -7.8  | -8.2  | -6.8  | -2.9  | 9.1   | -1.7 | 25.7  | -2.6  | -2.1  | -12.0 |
|    |            |                                              | FM3 | -14.9 | -11.5 | -9.0  | 3.3   | -13.7 | -0.5  | -15.9 | -4.5 | 9.8   | 0.3   | 32.0  | 6.2   |
|    |            |                                              | FM4 | 11.6  | 14.0  | -12.7 | -5.0  | -1.2  | -9.7  | 15.6  | 5.2  | 40.4  | 69.9  | 45.3  | -1.2  |
| 28 | S629       | <i>Kocuria dechangensis</i>                  | FM1 | -6.3  | 1.6   | -9.2  | -5.4  | 7.9   | -3.4  | -3.5  | -0.7 | 14.1  | -9.5  | 4.5   | -6.2  |
|    | (OQ509837) | NEAU-ST5-33 <sup>T</sup> , 99.0%             | FM2 | -14.1 | -29.8 | -12.2 | -7.3  | 29.1  | -5.5  | -1.2  | -4.8 | -4.4  | -3.6  | 1.7   | -8.7  |
|    |            |                                              | FM3 | 22.2  | -9.3  | -15.9 | -18.0 | 28.7  | -7.3  | -8.9  | -1.1 | -15.4 | 10.6  | 1.2   | -8.9  |
|    |            |                                              | FM4 | -10.2 | -1.4  | -15.4 | -5.0  | 39.9  | -4.7  | -1.4  | -8.8 | 49.6  | 71.5  | 7.1   | 58.2  |
| 29 | S573       | <i>Kocuria dechangensis</i>                  | FM1 | 2.7   | 6.1   | -5.5  | -15.2 | -15.6 | -6.9  | 8.0   | 1.1  | -2.6  | -6.7  | 9.5   | 7.3   |
|    | (OQ509838) | NEAU-ST5-33 <sup>T</sup> , 99.0%             | FM2 | 10.1  | 4.2   | -14.3 | -9.9  | -22.5 | -16.7 | -11.0 | -8.9 | 12.3  | -4.5  | 0.0   | 21.1  |
|    |            |                                              | FM3 | 9.8   | 9.4   | -13.4 | -10.6 | -20.9 | -13.5 | -4.0  | -5.0 | 9.0   | -8.6  | -1.2  | 15.6  |
|    |            |                                              | FM4 | 7.2   | 9.4   | -1.9  | -12.0 | -15.9 | -8.2  | -4.6  | -7.7 | 49.6  | 67.6  | 33.4  | 70.2  |
| 30 | S910       | <i>Nesterenkonia halotolerans</i>            | FM1 | -8.3  | 0.6   | -5.3  | -7.6  | -8.3  | -9.3  | 9.0   | -5.2 | 13.1  | -2.5  | 3.5   | -15.6 |
|    | (OQ509839) | YIM 70084 <sup>T</sup> , 99.9%               | FM2 | -9.2  | 3.5   | -16.3 | -9.9  | -11.6 | -7.1  | -15.2 | -9.6 | -6.5  | -4.2  | -13.5 | -18.0 |

|    |                     |                                                                     |  |     |       |       |       |       |       |       |       |       |       |       |       |       |
|----|---------------------|---------------------------------------------------------------------|--|-----|-------|-------|-------|-------|-------|-------|-------|-------|-------|-------|-------|-------|
|    |                     |                                                                     |  | FM3 | -6.4  | 3.6   | -17.5 | -8.1  | -17.4 | -3.1  | -17.3 | -8.0  | -6.4  | -1.7  | -3.8  | -11.3 |
|    |                     |                                                                     |  | FM4 | -12.7 | 0.1   | -11.8 | -13.6 | -9.8  | -1.1  | -12.0 | -11.7 | 59.3  | 73.0  | 46.7  | 71.1  |
|    |                     |                                                                     |  | FM1 | 5.3   | -5.8  | -9.4  | 5.7   | -3.1  | -7.3  | -4.1  | 8.3   | 1.3   | -8.1  | 7.4   | 9.7   |
|    |                     |                                                                     |  | FM2 | -9.2  | -4.9  | -3.5  | -6.3  | -2.5  | -8.2  | -12.9 | -3.3  | -8.5  | -9.3  | -7.6  | 2.1   |
| 31 | LD-11<br>(OQ509840) | <i>Nesterenkonia halotolerans</i><br>YIM 70084 <sup>T</sup> , 99.9% |  | FM3 | -7.0  | -1.7  | -15.0 | 3.4   | -2.9  | -7.4  | -6.2  | -6.1  | -1.1  | -7.0  | 3.8   | 30.8  |
|    |                     |                                                                     |  | FM4 | -7.1  | 2.5   | -16.1 | -13.4 | -9.7  | -6.9  | -3.2  | -7.7  | 29.8  | 65.0  | 34.6  | 41.6  |
|    |                     |                                                                     |  | FM1 | 4.5   | -9.9  | -11.2 | -9.8  | -1.8  | -12.3 | -13.5 | -9.8  | -5.7  | -5.6  | -6.4  | -6.6  |
|    |                     |                                                                     |  | FM2 | -5.5  | -15.9 | -15.6 | -6.2  | -5.4  | -6.6  | -16.6 | -2.8  | -6.5  | -17.0 | -20.1 | -9.1  |
| 32 | S491<br>(OQ509841)  | <i>Nesterenkonia lutea</i> YIM<br>70081 <sup>T</sup> , 99.3%        |  | FM3 | -17.2 | -12.9 | 1.1   | -6.2  | -4.9  | 1.4   | -6.7  | -3.6  | 46.0  | -13.4 | -4.5  | -0.8  |
|    |                     |                                                                     |  | FM4 | 4.3   | 7.1   | -8.3  | -1.3  | -2.0  | -7.0  | -7.4  | -12.9 | 62.0  | 14.5  | 13.5  | 23.0  |
|    |                     |                                                                     |  | FM1 | -7.8  | -6.7  | -10.7 | -5.8  | -2.5  | -21.0 | -13.2 | 32.8  | 14.7  | 8.4   | 15.9  | -12.2 |
|    |                     |                                                                     |  | FM2 | -12.3 | 1.7   | -15.7 | -12.7 | -14.5 | -23.9 | -6.8  | 16.3  | 10.3  | 12.0  | 47.2  | -15.6 |
| 33 | 244-1<br>(OQ509842) | <i>Nesterenkonia lutea</i> YIM<br>70081 <sup>T</sup> , 99.4%        |  | FM3 | 2.0   | -6.0  | -14.8 | -11.0 | -6.0  | -7.0  | -21.2 | -12.8 | -14.7 | -7.0  | 18.2  | 5.3   |
|    |                     |                                                                     |  | FM4 | -14.6 | 6.7   | -11.6 | -9.9  | -6.4  | -3.4  | -14.3 | -14.7 | 56.8  | 57.1  | 23.5  | 61.6  |
|    |                     |                                                                     |  | FM1 | 17.4  | 0.2   | 14.5  | -7.7  | 17.6  | 42.4  | -0.2  | 64.7  | -9.3  | -4.1  | 13.5  | 44.3  |
|    |                     |                                                                     |  | FM2 | -8.1  | -12.1 | -8.8  | -14.7 | 4.4   | 26.1  | 38.5  | -8.8  | -10.1 | -2.6  | 8.2   | 14.2  |
| 34 | 46<br>(OQ509843)    | <i>Dietzia psychralcaliphila</i> JCM<br>10987 <sup>T</sup> , 99.7%  |  | FM3 | -12.8 | -14.1 | 2.4   | -10.2 | 4.2   | 15.1  | 22.9  | 4.1   | -7.6  | -2.3  | 24.3  | 31.0  |
|    |                     |                                                                     |  | FM4 | -4.4  | 7.6   | -16.2 | -12.3 | -3.1  | 37.7  | 4.8   | -1.7  | -6.9  | -6.3  | 22.5  | 19.7  |
|    |                     |                                                                     |  | FM1 | -10.4 | -8.3  | 2.2   | 96.3  | -7.9  | 6.0   | 2.9   | 14.7  | -6.4  | -12.1 | -6.9  | 17.4  |
|    |                     |                                                                     |  | FM2 | -9.4  | -10.7 | -7.5  | 8.2   | -5.9  | -8.8  | -4.0  | 3.5   | -6.8  | -10.5 | 20.8  | -9.7  |
| 35 | S679<br>(OQ509844)  | <i>Dietzia psychralcaliphila</i> CMS<br>76or <sup>T</sup> , 99.9%   |  | FM3 | -8.0  | -14.3 | -11.5 | -0.7  | -9.6  | -9.2  | -6.8  | -2.9  | -7.9  | -14.9 | 11.6  | -0.4  |
|    |                     |                                                                     |  | FM4 | -13.1 | 7.1   | -8.9  | 10.9  | -5.3  | -6.3  | -3.1  | -7.7  | 15.2  | 44.6  | 17.0  | 13.9  |
|    |                     |                                                                     |  | FM1 | -1.7  | -7.8  | -8.1  | -3.7  | -12.0 | -10.6 | -8.8  | -11.9 | 15.7  | -8.1  | -12.8 | -9.3  |
|    |                     |                                                                     |  | FM2 | -9.6  | -1.1  | -13.3 | -1.3  | -13.2 | -13.1 | -10.9 | -6.1  | 24.2  | 11.4  | -4.0  | -7.1  |
| 36 | 298<br>(OQ509845)   | <i>Dietzia psychralcaliphila</i> JCM<br>10987 <sup>T</sup> , 99.2%  |  | FM3 | -0.5  | -9.7  | -6.8  | -4.6  | -4.0  | -15.6 | -11.2 | -13.7 | 48.1  | -0.8  | -16.4 | -5.3  |

|    |            |                                                |     |       |       |       |       |       |       |       |       |       |       |       |       |
|----|------------|------------------------------------------------|-----|-------|-------|-------|-------|-------|-------|-------|-------|-------|-------|-------|-------|
|    |            |                                                | FM4 | -6.4  | -7.2  | -13.8 | -5.1  | 95.2  | -9.2  | -12.0 | -4.8  | 60.4  | 14.7  | 38.1  | 45.6  |
| 37 | S631       | <i>Pseudarthrobacter</i>                       | FM1 | -7.8  | -10.8 | -5.6  | -5.3  | -0.3  | -5.8  | -7.3  | 5.6   | 9.5   | -13.4 | 28.0  | -16.2 |
|    | (OQ509846) | <i>sulfonivorans</i> ALL <sup>T</sup> , 99.6%  | FM2 | -2.3  | -12.0 | -11.3 | -15.0 | -15.5 | -12.9 | -2.3  | -8.5  | 12.3  | 16.2  | 5.9   | -14.7 |
|    |            |                                                | FM3 | 2.0   | -13.2 | 15.6  | -13.8 | -12.4 | -10.8 | -6.7  | -9.1  | 18.0  | -0.8  | 31.1  | 40.7  |
|    |            |                                                | FM4 | -14.6 | 1.7   | -8.0  | -9.8  | -11.4 | -10.3 | -2.0  | -8.9  | 75.8  | 61.6  | 19.2  | 70.7  |
| 38 | S511       | <i>Pseudarthrobacter</i>                       | FM1 | -6.6  | -4.3  | 96.3  | -7.1  | -0.9  | 4.1   | 13.5  | 8.4   | 16.2  | 28.4  | 10.7  | 20.7  |
|    | (OQ509847) | <i>sulfonivorans</i> ALL <sup>T</sup> , 99.6%  | FM2 | -7.0  | -3.3  | 8.2   | -12.7 | -9.1  | 9.0   | -17.3 | 11.3  | 9.0   | -17.0 | -12.1 | 3.1   |
|    |            |                                                | FM3 | -3.0  | -9.4  | -0.7  | -6.7  | -8.5  | -0.3  | 20.0  | 12.5  | 37.3  | -19.8 | 10.6  | -2.2  |
|    |            |                                                | FM4 | -8.9  | -11.6 | 10.9  | -3.5  | -8.9  | -8.4  | 22.2  | 5.1   | 53.5  | 45.1  | 26.5  | 59.3  |
| 39 | 91         | <i>Nocardiopsis yanglingensis</i>              | FM1 | 78.6  | 0.2   | 13.4  | -4.4  | 17.2  | 12.9  | 57.8  | 23.1  | -8.9  | -1.2  | -1.2  | 2.0   |
|    | (OQ509848) | A18 <sup>T</sup> , 98.7%                       | FM2 | -0.8  | -2.0  | 9.7   | 2.4   | 14.1  | -10.7 | 41.1  | -13.9 | -9.2  | -5.0  | 7.6   | 22.5  |
|    |            |                                                | FM3 | -9.0  | -7.3  | 19.2  | -27.2 | -1.0  | 10.2  | 8.7   | -12.7 | -9.0  | -2.0  | 24.8  | 34.9  |
|    |            |                                                | FM4 | -8.4  | -9.1  | -5.1  | -3.4  | 10.3  | -8.0  | -8.6  | -3.8  | -1.1  | -1.2  | 13.5  | 18.4  |
| 40 | 85         | <i>Nocardiopsis flavescens</i>                 | FM1 | 0.5   | 14.0  | -3.3  | -1.8  | -10.5 | -9.7  | 10.4  | -5.6  | -7.9  | -6.0  | 9.6   | 17.8  |
|    | (OQ509849) | CGMCC 4.5723 <sup>T</sup> , 99.2%              | FM2 | 9.5   | -12.2 | -14.5 | -3.9  | -4.7  | -9.3  | -13.4 | -7.7  | 79.9  | 83.4  | 84.2  | 10.7  |
|    |            |                                                | FM3 | 0.5   | -1.1  | -16.8 | -16.0 | -10.5 | -3.4  | -9.8  | -2.8  | -7.7  | -6.9  | 42.5  | 37.1  |
|    |            |                                                | FM4 | -1.2  | -0.5  | -7.2  | -15.3 | -2.6  | -3.3  | -5.2  | -4.2  | -4.8  | -5.4  | 32.9  | 44.3  |
| 41 | LD-10      | <i>Georgenia soli</i> DSM 21838 <sup>T</sup> , | FM1 | -11.7 | 5.7   | -8.1  | -16.8 | -5.7  | -4.6  | 2.3   | 10.8  | 4.9   | -10.9 | 12.1  | 9.3   |
|    | (OQ509850) | 98.7%                                          | FM2 | -13.6 | 9.9   | -6.8  | -16.8 | -4.9  | -7.5  | -13.5 | -18.9 | 12.3  | -4.7  | -4.7  | 13.1  |
|    |            |                                                | FM3 | 0.5   | 3.0   | -5.3  | -11.4 | 5.8   | -11.6 | -12.4 | -5.2  | 4.1   | 14.8  | 0.7   | 0.4   |
|    |            |                                                | FM4 | 6.4   | 6.3   | -3.8  | -3.3  | 8.9   | -8.9  | -10.7 | -1.1  | 53.8  | 67.6  | 29.9  | 66.4  |
| 42 | S532       | <i>Cellulomonas oligotrophica</i>              | FM1 | 4.2   | -5.0  | -4.9  | -7.8  | -4.1  | -2.9  | -2.1  | -7.5  | 2.8   | 4.0   | 4.4   | -5.5  |
|    | (OQ509851) | Kc5 <sup>T</sup> , 99.7%                       | FM2 | 9.4   | -8.2  | -14.1 | -18.8 | -8.2  | -8.2  | -0.3  | -2.3  | 36.2  | 16.2  | 0.2   | -8.5  |
|    |            |                                                | FM3 | 9.9   | -8.1  | -18.3 | -12.0 | -5.3  | -1.6  | -0.7  | -14.2 | -12.9 | 19.8  | 19.4  | -7.5  |
|    |            |                                                | FM4 | 0.8   | -17.4 | -12.0 | -13.8 | -9.3  | -8.6  | -7.2  | -15.7 | 37.6  | 60.9  | 15.9  | -10.9 |

|    |                     |                                                                             |     |       |       |       |       |       |       |       |       |       |       |       |      |
|----|---------------------|-----------------------------------------------------------------------------|-----|-------|-------|-------|-------|-------|-------|-------|-------|-------|-------|-------|------|
| 43 | S675<br>(OQ509852)  | <i>Jonesia quinghaiensis</i> DSM<br>15701 <sup>T</sup> , 99.9%              | FM1 | 2.3   | -11.5 | -3.3  | 0.1   | -8.3  | -6.8  | 0.8   | 7.1   | -15.2 | -6.2  | -0.3  | 44.5 |
|    |                     |                                                                             | FM2 | -10.5 | -8.1  | -5.3  | -13.5 | -4.7  | -2.6  | -2.9  | -7.7  | 9.5   | -14.5 | -12.6 | 10.4 |
|    |                     |                                                                             | FM3 | -12.2 | -5.4  | -9.7  | 4.6   | -7.3  | -5.6  | -9.5  | -10.3 | 23.7  | 11.7  | 24.4  | 17.0 |
|    |                     |                                                                             | FM4 | -15.7 | -6.8  | -11.0 | -3.1  | -6.3  | -5.1  | -6.7  | -14.5 | 42.1  | 75.6  | 56.4  | 26.1 |
| 44 | 453-2<br>(OQ509853) | <i>Micromonospora<br/>olivasterospora</i> DSM 43868 <sup>T</sup> ,<br>99.5% | FM1 | -3.5  | 16.5  | -5.1  | -15.0 | 15.7  | 9.5   | 4.0   | -10.3 | -5.2  | -9.8  | 8.2   | 64.1 |
|    |                     |                                                                             | FM2 | -8.1  | 8.0   | -5.9  | -13.2 | 8.4   | 18.5  | -7.9  | -14.0 | -5.1  | -6.7  | -18.7 | 16.4 |
|    |                     |                                                                             | FM3 | -4.4  | 1.0   | -13.3 | -14.5 | 10.1  | -13.1 | -6.4  | -14.7 | -9.8  | -1.1  | 48.1  | 34.6 |
|    |                     |                                                                             | FM4 | 17.8  | 2.0   | -10.9 | -9.3  | 2.1   | -4.8  | -9.8  | -11.3 | -3.6  | 1.6   | 21.6  | 50.0 |
| 45 | LD-7<br>(OQ509854)  | <i>Hoyosella rhizosphaerae</i><br>J12GA03 <sup>T</sup> , 100.0%             | FM1 | -11.1 | -9.5  | 3.0   | 9.2   | -18.0 | -4.4  | -12.6 | 4.0   | -9.8  | -8.9  | 8.8   | -7.0 |
|    |                     |                                                                             | FM2 | -15.4 | -3.7  | 0.4   | 0.5   | -5.8  | -8.3  | -16.0 | 2.2   | -2.6  | -3.5  | 16.1  | -9.3 |
|    |                     |                                                                             | FM3 | -11.8 | -8.4  | 8.0   | -2.7  | -3.0  | -2.6  | -11.0 | -1.8  | -14.2 | -4.8  | 18.0  | -7.5 |
|    |                     |                                                                             | FM4 | -16.1 | -8.1  | 6.3   | 4.3   | -4.1  | -8.8  | -16.5 | -9.8  | 56.8  | 67.4  | 38.8  | 67.3 |
| 46 | S697<br>(OQ509855)  | <i>Agromyces indicus</i><br>NIO-1018 <sup>T</sup> , 99.0%                   | FM1 | -18.6 | 2.1   | 2.6   | -4.4  | -9.9  | -7.8  | -16.3 | -7.2  | 9.3   | 2.8   | 11.1  | 2.7  |
|    |                     |                                                                             | FM2 | -9.3  | -0.6  | -4.8  | -6.9  | -5.6  | -0.9  | -13.5 | -0.9  | 28.8  | 11.1  | 5.2   | 5.1  |
|    |                     |                                                                             | FM3 | -14.4 | -2.7  | -2.2  | 5.4   | -6.3  | -4.7  | 2.7   | 12.2  | 17.5  | 14.8  | 16.1  | 6.7  |
|    |                     |                                                                             | FM4 | -6.5  | -9.9  | -11.7 | -11.4 | -4.4  | -9.4  | -4.4  | -12.9 | 47.0  | 33.1  | 35.6  | 60.0 |

**Table S5.** Antimicrobial activities of crude extracts from two selected *Streptomyces* strains 378 and 549. S, sensitive; R, resistant.

| Isolates                                                                                                     | Fermentation media | Inhibitory Rate (IR)                                                                                     |      |                      |   |                      |   |                     |     |                  |      |                    |      |
|--------------------------------------------------------------------------------------------------------------|--------------------|----------------------------------------------------------------------------------------------------------|------|----------------------|---|----------------------|---|---------------------|-----|------------------|------|--------------------|------|
|                                                                                                              |                    | <i>E. coli</i>                                                                                           |      | <i>P. aeruginosa</i> |   | <i>K. pneumoniae</i> |   | <i>A. baumannii</i> |     | <i>S. aureus</i> |      | <i>E. faecalis</i> |      |
|                                                                                                              |                    | S                                                                                                        | R    | S                    | R | S                    | R | S                   | R   | S                | R    | S                  | R    |
|                                                                                                              |                    | Inhibitory zone (diameter, cm), tested by the paper-disk diffusion method with extracts of 100 mL medium |      |                      |   |                      |   |                     |     |                  |      |                    |      |
| 378                                                                                                          | FM4                | 0.9                                                                                                      |      |                      |   |                      |   |                     |     | 1.5              | 1.6  | 1.0                | 1.4  |
| 549                                                                                                          | FM4                | 1.1                                                                                                      | 1.0  |                      |   |                      |   | 1.0                 | 0.8 | 1.1              | 1.4  | 1.1                | 1.3  |
| Inhibitory rate (IR, %), tested by the turbidometric assay (OD <sub>600</sub> ) with extracts of 2 mL medium |                    |                                                                                                          |      |                      |   |                      |   |                     |     |                  |      |                    |      |
| 378                                                                                                          | FM4                | 83.5                                                                                                     |      |                      |   |                      |   |                     |     | 76.6             | 78.7 | 84.4               | 78.0 |
| 549                                                                                                          | FM4                | 78                                                                                                       | 85.1 |                      |   |                      |   |                     |     | 91.7             | 81.7 | 86.1               | 76.7 |

**Table S6.** Putatively identified metabolites from liquid culture extracts of strains 378 and 549.  $t_R$ , retention time in UPLC.

| No. | Strain | $t_R$<br>(min) | Observed m/z | Calculated<br>m/z | Putative chemical | Molecular<br>formula    | Chemical structure                                                                    |
|-----|--------|----------------|--------------|-------------------|-------------------|-------------------------|---------------------------------------------------------------------------------------|
| 1   | 378    | 4.13           | 1189.5858    | 1189.5829         | cosmomycin D      | $C_{60}H_{88}N_2O_{22}$ | 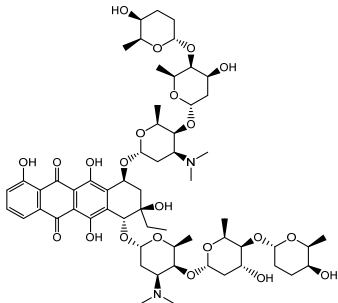   |
| 2   | 378    | 4.74           | 1173.5915    | 1173.5880         | cosmomycin C      | $C_{60}H_{88}N_2O_{21}$ |   |
| 3   | 378    | 7.81           | 772.3502     | 772.3466          | cosmomycin B      | $C_{40}H_{53}NO_{14}$   |  |

|   |     |      |           |           |                     |                                                                |                                                                                      |
|---|-----|------|-----------|-----------|---------------------|----------------------------------------------------------------|--------------------------------------------------------------------------------------|
| 4 | 378 | 8.27 | 756.3540  | 756.3517  | cosmomycin A        | C <sub>40</sub> H <sub>53</sub> NO <sub>13</sub>               | 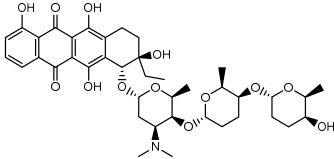  |
| 5 | 549 | 5.17 | 747.3440  | 747.3415  | hedamycin           | C <sub>41</sub> H <sub>50</sub> N <sub>2</sub> O <sub>11</sub> |   |
| 6 | 549 | 6.70 | 689.3432  | 689.3460  | kidamycin           | C <sub>39</sub> H <sub>48</sub> N <sub>2</sub> O <sub>9</sub>  |   |
| 7 | 378 | 4.38 | 1187.5710 | 1187.5672 | dehydrocosmomycin D | C <sub>60</sub> H <sub>86</sub> N <sub>2</sub> O <sub>22</sub> |  |

|    |     |      |           |           |                     |                                                                |                                                                                      |
|----|-----|------|-----------|-----------|---------------------|----------------------------------------------------------------|--------------------------------------------------------------------------------------|
| 8  | 378 | 4.96 | 1171.5734 | 1171.5723 | dehydrocosmomycin C | C <sub>60</sub> H <sub>86</sub> N <sub>2</sub> O <sub>21</sub> | 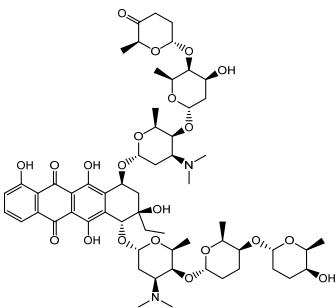  |
| 9  | 378 | 5.16 | 1171.5734 | 1171.5723 | A447 D              | C <sub>60</sub> H <sub>86</sub> N <sub>2</sub> O <sub>21</sub> |   |
| 10 | 378 | 5.73 | 1157.5942 | 1157.5930 | A447 C              | C <sub>60</sub> H <sub>88</sub> N <sub>2</sub> O <sub>20</sub> |  |

|    |     |      |           |           |                         |                                                                |                                                                                      |
|----|-----|------|-----------|-----------|-------------------------|----------------------------------------------------------------|--------------------------------------------------------------------------------------|
| 11 | 378 | 6.83 | 1075.5158 | 1075.5148 | $\beta$ -rhodomycin S-4 | C <sub>54</sub> H <sub>78</sub> N <sub>2</sub> O <sub>20</sub> | 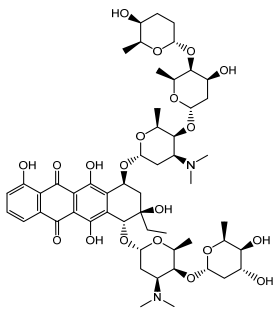  |
| 12 | 378 | 4.83 | 1173.5925 | 1173.5880 | unknown                 | C <sub>60</sub> H <sub>88</sub> N <sub>2</sub> O <sub>21</sub> | CosD lacks one hydroxyl group in the aglycone                                        |
| 13 | 378 | 6.21 | 1155.5762 | 1155.5774 | unknown                 | C <sub>60</sub> H <sub>86</sub> N <sub>2</sub> O <sub>20</sub> | A447 C contains a double bond in one outermost sugar (rho)                           |
| 14 | 378 | 8.09 | 754.3381  | 754.3360  | cosmocarcin C           | C <sub>40</sub> H <sub>51</sub> NO <sub>13</sub>               |   |
| 15 | 378 | 8.85 | 740.3557  | 740.3568  | unknown                 | C <sub>40</sub> H <sub>51</sub> NO <sub>12</sub>               | dehydroxylated CosA                                                                  |
| 16 | 549 | 9.48 | 705.3298  | 705.3309  | epoxykidamycin          | C <sub>39</sub> H <sub>48</sub> N <sub>2</sub> O <sub>10</sub> |  |

|    |     |      |          |          |                                    |                                                                |                                                                                       |
|----|-----|------|----------|----------|------------------------------------|----------------------------------------------------------------|---------------------------------------------------------------------------------------|
| 17 | 549 | 7.64 | 687.3245 | 687.3203 | dehydrokidamycin                   | C <sub>39</sub> H <sub>46</sub> N <sub>2</sub> O <sub>9</sub>  | 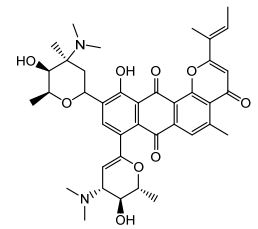   |
| 18 | 549 | 9.21 | 717.3650 | 717.3673 | saptomycin C1                      | C <sub>41</sub> H <sub>52</sub> N <sub>2</sub> O <sub>9</sub>  |    |
| 19 | 549 | 7.96 | 719.3841 | 719.3829 | dihydrosaptomycin C1               | C <sub>41</sub> H <sub>54</sub> N <sub>2</sub> O <sub>9</sub>  |    |
| 20 | 549 | 6.26 | 731.3477 | 731.3465 | neopluramycin<br>(acetylkidamycin) | C <sub>41</sub> H <sub>50</sub> N <sub>2</sub> O <sub>10</sub> |   |
| 21 | 549 | 6.13 | 733.3632 | 733.3622 | rubiflaoin E                       | C <sub>41</sub> H <sub>52</sub> N <sub>2</sub> O <sub>10</sub> |  |

**Table S7.** Biosynthesis gene clusters of secondary metabolites from strain 378 detected by anti-SMASH.

|    | Type                              | Location        | Most similar known cluster            | Similarity |
|----|-----------------------------------|-----------------|---------------------------------------|------------|
| 1  | T2PKS, oligosaccharide            | 50,817-123,326  | cytorhodin                            | 84%        |
| 2  | T3PKS                             | 382,152-423,204 | alkylresorcinol                       | 100%       |
| 3  | butyrolactone                     | 567,949-579,331 | coelimycin P1                         | 8%         |
| 4  | RiPP-like, NRP-metallophore, NRPS | 296,611-365,956 | coelichelin                           | 100%       |
| 5  | Terpenehopene                     | 437,769-464,456 | hopene                                | 92%        |
| 6  | Melanin                           | 337,853-348,215 | melanin                               | 57%        |
| 7  | RRE-containing                    | 272,299-292,586 | belactosin A/belactosin C             | 12%        |
| 8  | T1PKS,NRPS                        | 19,354-70,069   | rifamorpholine                        | 9%         |
| 9  | Terpene                           | 275,236-297,056 | streptozotocin                        | 23%        |
| 10 | RiPP-like                         | 19,951-30,172   | BD-12                                 | 10%        |
| 11 | Terpene                           | 16,385-38,550   | geosmin                               | 100%       |
| 12 | T1PKS, butyrolactone              | 235,739-283,174 | tambjamine BE-18591                   | 17%        |
| 13 | NRPS                              | 193,312-271,916 | cyclofaulknamycin                     | 8%         |
| 14 | Lanthipeptide-class-i             | 191,215-217,668 |                                       |            |
| 15 | Terpene                           | 347-21,005      | isorenieratene                        | 100%       |
| 16 | Terpene                           | 152,076-172,999 | albaflavenone                         | 100%       |
| 17 | NI-siderophore                    | 7,443-20,585    |                                       |            |
| 18 | T1PKS                             | 160,742-193,114 | s56-p1                                | 11%        |
| 19 | Ectoine                           | 93,981-104,379  | ectoine                               | 100%       |
| 20 | T1PKS                             | 3,838-47,806    | chlorothricin/deschlorothricin        | 4%         |
| 21 | RiPP-like                         | 109,850-120,065 | informatipeptin                       | 42%        |
| 22 | Terpene                           | 146,464-167,495 | versipelostatin                       | 5%         |
| 23 | NI-siderophore                    | 59,965-71,782   |                                       |            |
| 24 | Terpene                           | 36,007-56,972   |                                       |            |
| 25 | melanin                           | 2,453-13,043    | melanin                               | 40%        |
| 26 | NI-siderophore                    | 88,963-100,732  | desferrioxamin<br>B/desferrioxamine E | 83%        |
| 27 | NAPAA                             | 1-20,361        | ε-Poly-L-lysine                       | 100%       |
| 28 | T2PKS,T3PKS                       | 12,219-92,280   | spore pigment                         | 83%        |
| 29 | Phosphonate                       | 11,857-24,778   |                                       |            |
| 30 | Lanthipeptide-class-i             | 1-18,358        |                                       |            |

**Table S8.** Biosynthesis gene clusters of secondary metabolites from strain 549 detected by anti-SMASH.

|    | Type                    | Location        | Most similar known cluster | Similarity |
|----|-------------------------|-----------------|----------------------------|------------|
| 1  | T2PKS, T1PKS            | 1-71,229        | hedamycin                  | 84%        |
| 2  | terpene                 | 200,479-222,352 | hopene                     | 30%        |
| 3  | lanthipeptide-class-i   | 121,766-158,585 | legonaridin                | 16%        |
| 4  | T1PKS, RiPP-like        | 24,364-71,770   | streptozotocin             | 7%         |
| 5  | ectoine                 | 154,001-164,405 | ectoine                    | 100%       |
| 6  | NRPS,T1PKS              | 7,170-58,130    | oryzanaphthopyran A        | 17%        |
| 7  | Terpene                 | 133,211-156,613 | isorenieratene             | 87%        |
| 8  | T1PKS                   | 77,053-121,303  | deoxyhangtaimycin          | 21%        |
| 9  | lanthipeptide-class-iii | 132,016-154,760 | AmfS                       | 100%       |
| 10 | RiPP-like               | 116,058-127,446 | streptamidine              | 66%        |
| 11 | Terpene                 | 40,758-63,157   | geosmin                    | 100%       |
| 12 | NI-siderophore          | 219-8,160       | desferrioxamine E          | 100%       |
| 13 | NI-siderophore          | 62,812-76,650   | peucechelin                | 20%        |
| 14 | NRPS-like               | 49,179-90,114   | glycopeptidolipid          | 13%        |
| 15 | Melanin                 | 29,228-39,704   | melanin                    | 28%        |
| 16 | Terpene                 | 7,154-28,311    | s56-p1                     | 3%         |
| 17 | lassopeptide            | 1-16,668        | lagmysin                   | 100%       |
| 18 | NRPS-like               | 1-27,149        | A54145                     | 5%         |
| 19 | NI-siderophore          | 7,613-22,276    |                            |            |
| 20 | T1PKS                   | 1-9,079         |                            |            |

**Figure S1.** Neighbor-joining phylogenetic tree based on 16S rRNA gene sequences of strain LD-9 (1509 bp) and related type species of family *Microbacteriaceae*. Numbers at nodes indicate the level of bootstrap support (> 50%) based on 1000 replications. Bar, 2 nt substitutions per 100 nt.

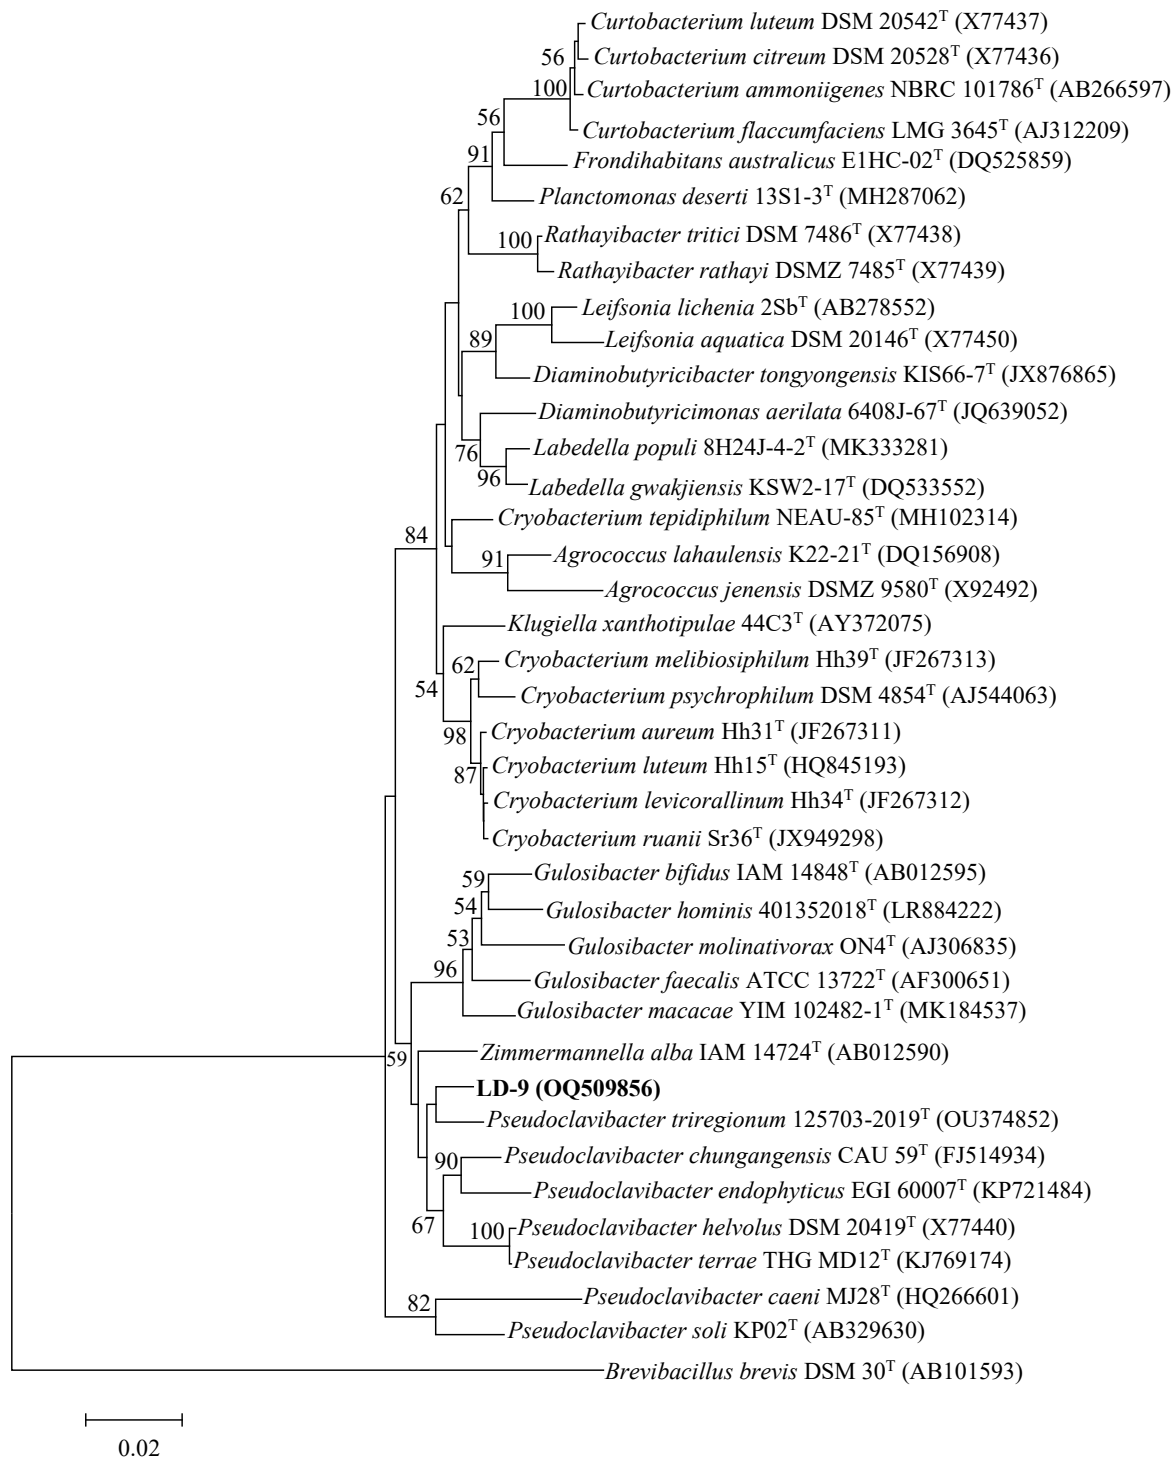

**Figure S2.** UPLC-MS/MS spectra of putative cosmomycin compounds (**7-15**) from strain 378 acquired by MS<sup>E</sup> method. **(a)** TIC of the ethyl acetate extract of strain 378. **(b)** MS/MS spectra of nine putative cosmomycin compounds.

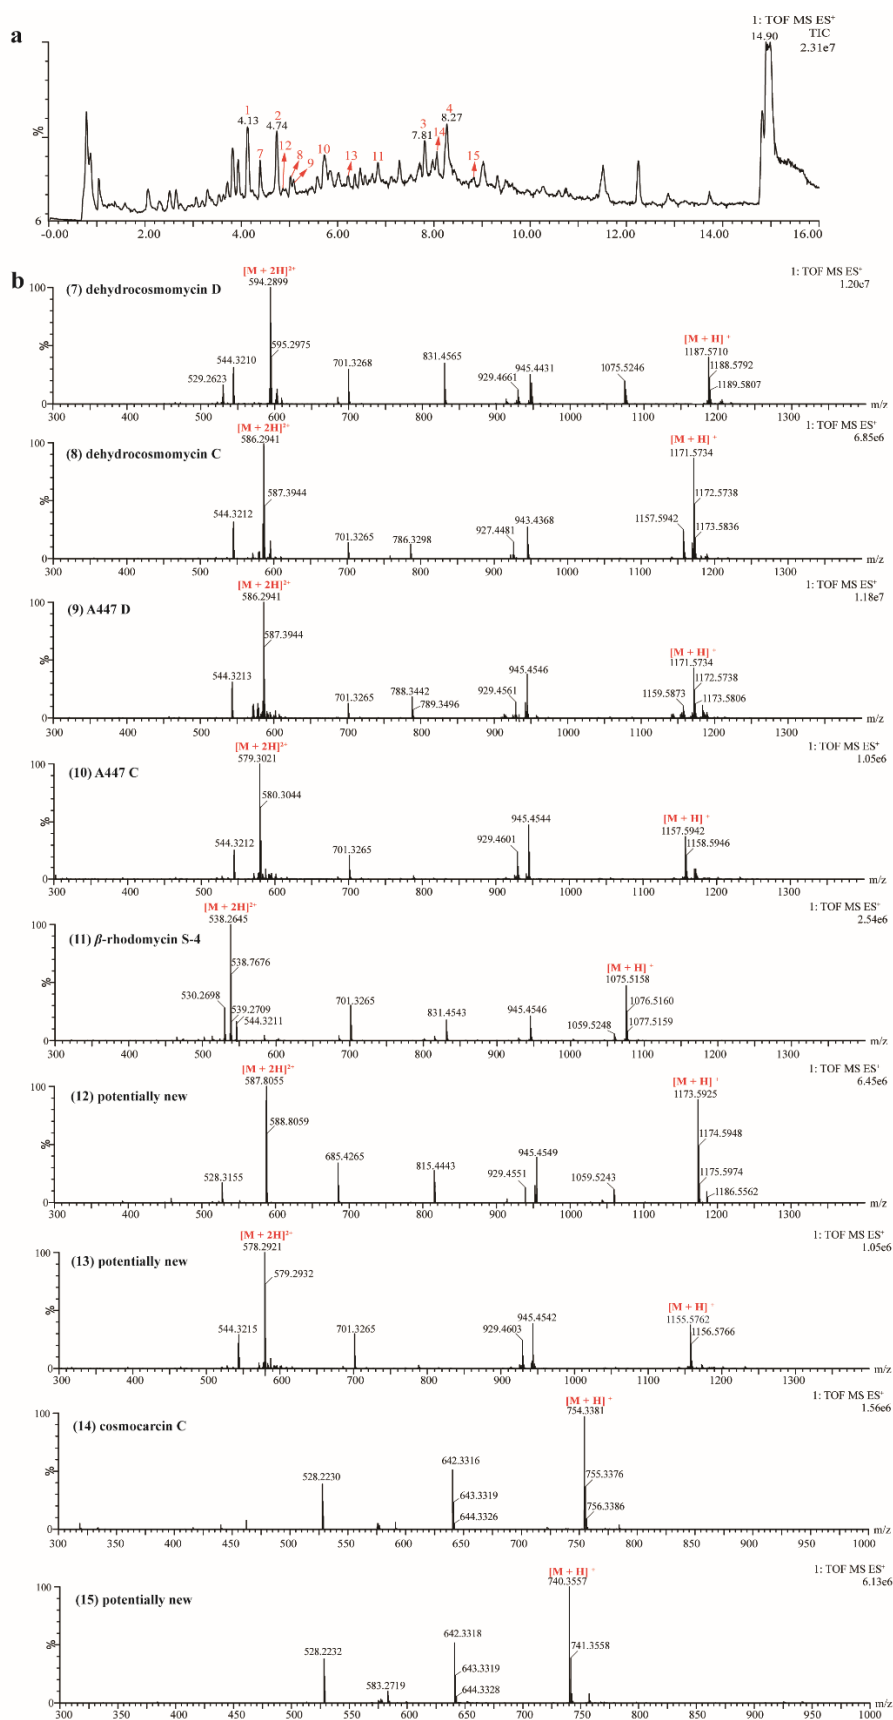

**Figure S3.** UPLC-MS/MS spectra of putative kidamycin derivatives (**16-21**) from strain 549 acquired by MS<sup>E</sup> method. (a) TIC of the ethyl acetate extract of strain 549. (b) MS/MS spectra of six kidamycin derivatives.

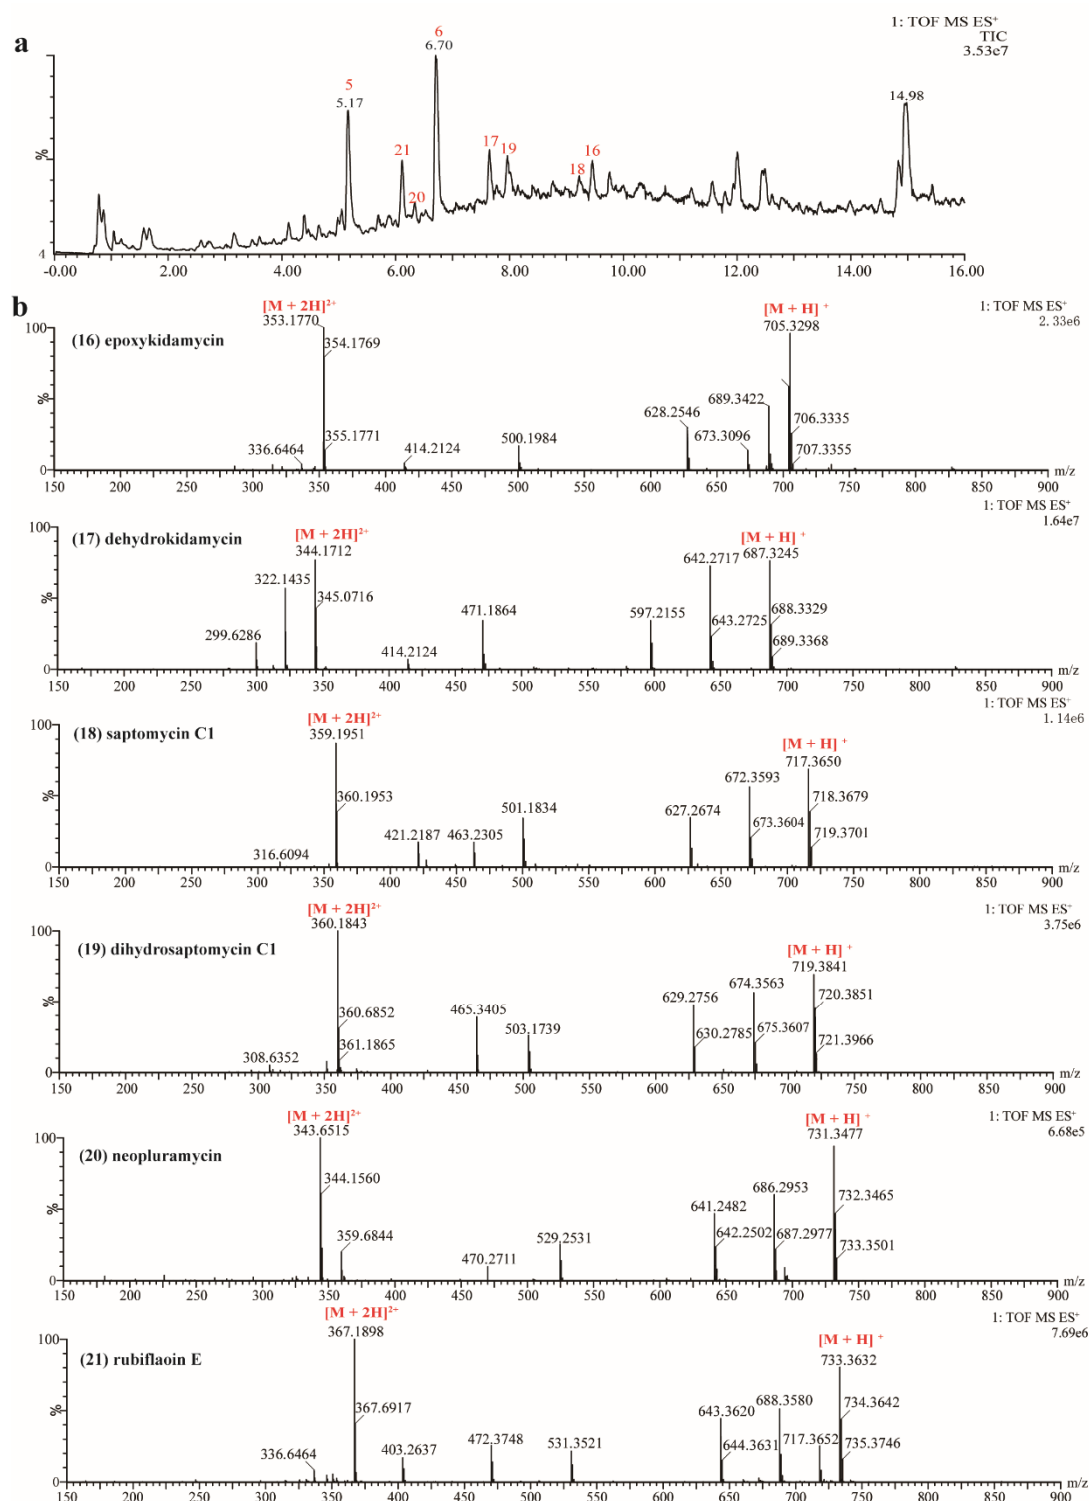

**Figure S4.** Similar known clusters for the putative type II polyketide BGC from strain 378.

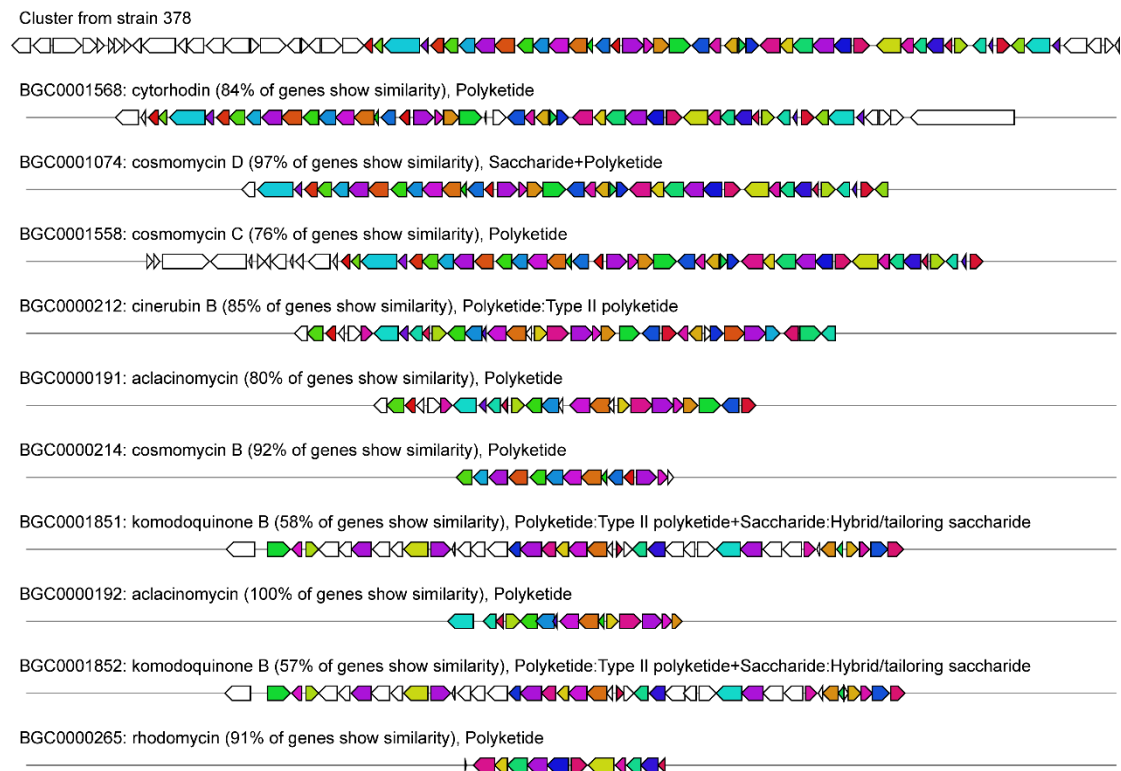

**Figure S5.** Similar known clusters for the putative type II polyketide BGC from strain 549.

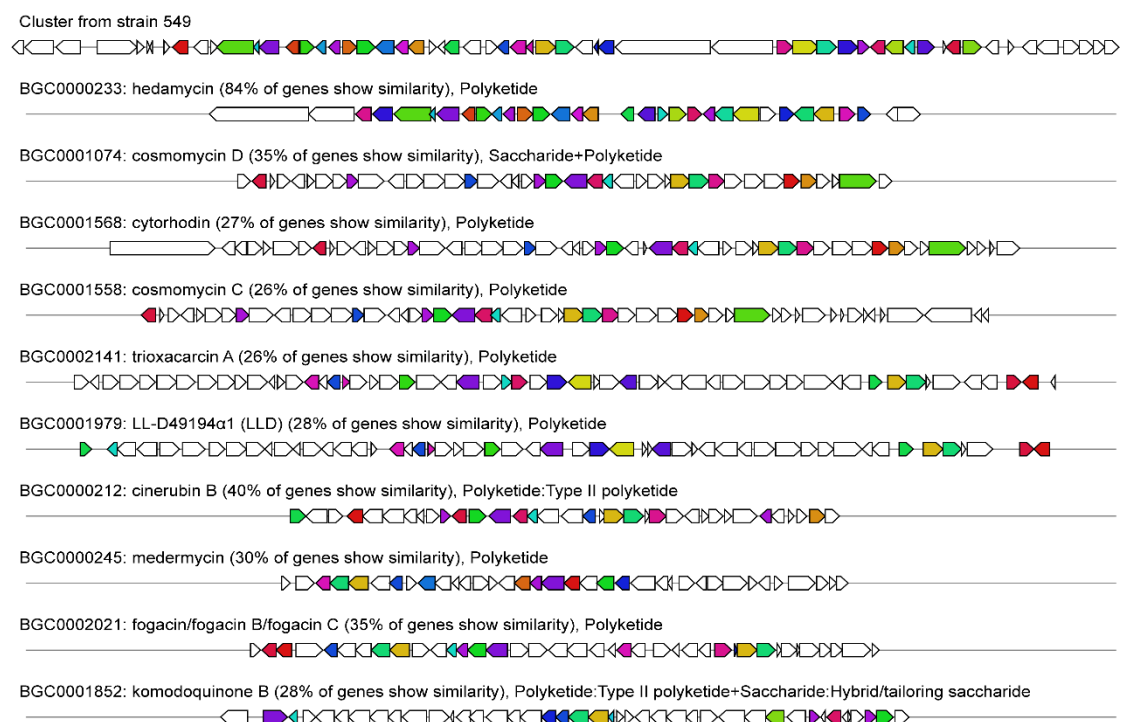

Supplement: s1 [file s1]
